# Supplementary material for: Enzymatic production of all fourteen partially acetylated chitosan tetramers using different chitin deacetylases acting in forward or reverse mode
Source: PubMed Central journal article supplement (PMC5735187; doi:10.1038/s41598-017-17950-6), 2017-12-18
Supplement: 41598_2017_17950_MOESM1_ESM.pdf [file 41598_2017_17950_MOESM1_ESM.pdf]

# **Enzymatic production of all fourteen partially acetylated chitosan tetramers using different chitin deacetylases acting in forward or reverse mode**

Lea Hembach<sup>1</sup>, Stefan Cord-Landwehr<sup>1</sup>, Bruno M. Moerschbacher<sup>1,\*</sup>

<sup>1</sup>Institut für Biologie und Biotechnologie der Pflanzen, Westfälische Wilhelms-Universität Münster, Schlossplatz 8, 48143  
Münster, Germany

\* corresponding author

**moersch@uni-muenster.de**

**A** Based on full amino acid sequence

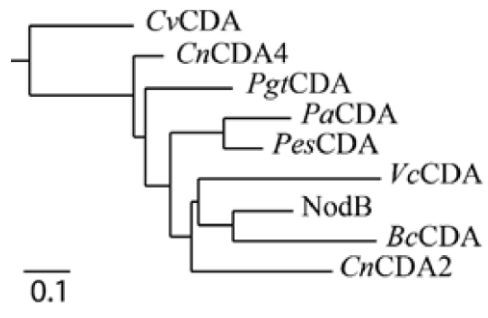

**B** Based on NodB homology domain

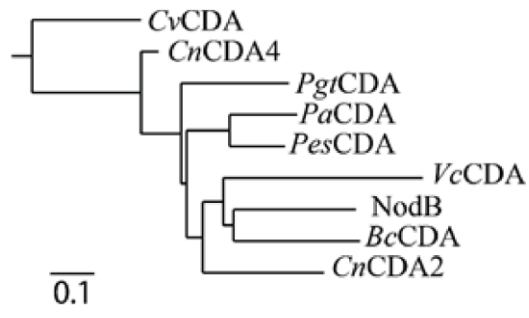

**Supplementary Figure S1** Phylogram based on A) full amino acid sequence of CDAs and B) based on NodB homology domains generated using COBALT National center for biological information <sup>44</sup>. Branch length represents sequence similarity.

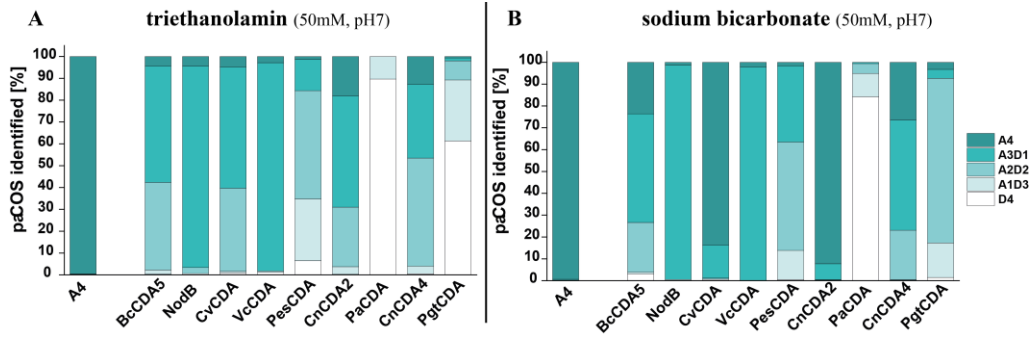

**Supplementary Figure S2** Relative amounts of different chito-oligosaccharides after performing enzymatic deacetylation of the chitin tetramer (A4, [GlcNAc]<sub>4</sub>) using different CDAs [*BcCDA5*, *NodB*, *CvCDA*, *VcCDA*, *PesCDA*, *CnCDA2*, *PaCDA*, *CnCDA4*, *PgtCDA*] for 98 h in **A** 50mM triethanolamine buffer pH 7 and **B** 50mM sodium bicarbonate buffer, pH 7. Data summarized in this figure have been generated by semi-quantitative HILIC-ESI-MS analysis.

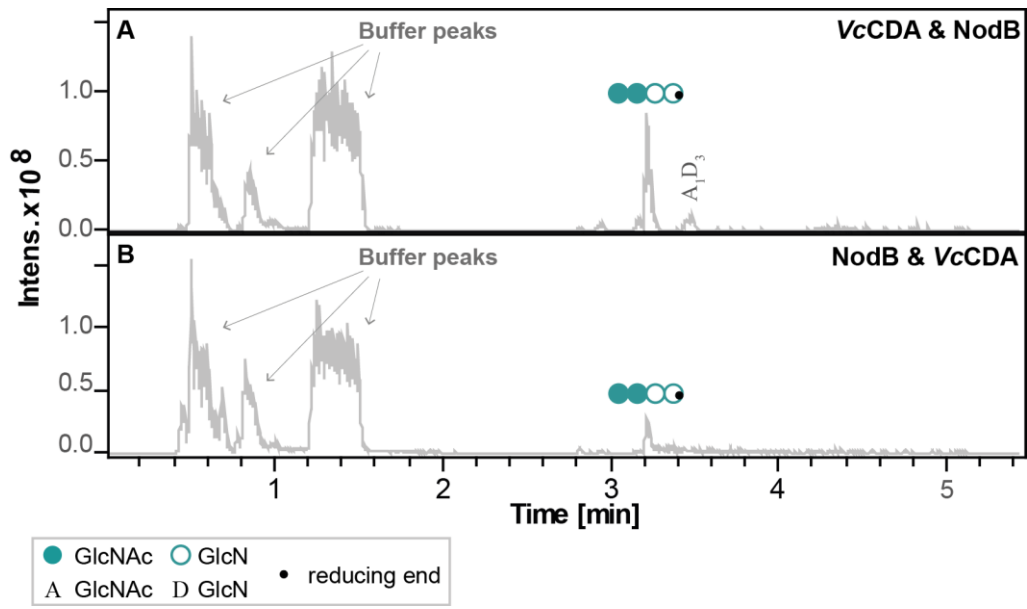

**Supplementary Figure S3** Base peak chromatogram of HILIC-ESI-MS analysis showing products after *N*-acetylation of the chitosan tetramer (D4, [GlcN]<sub>4</sub>, open circles) by two bacterial CDAs (VcCDA, NodB) with either A) first VcCDA and in a second *N*-acetylation step NodB or B) first NodB and then VcCDA.

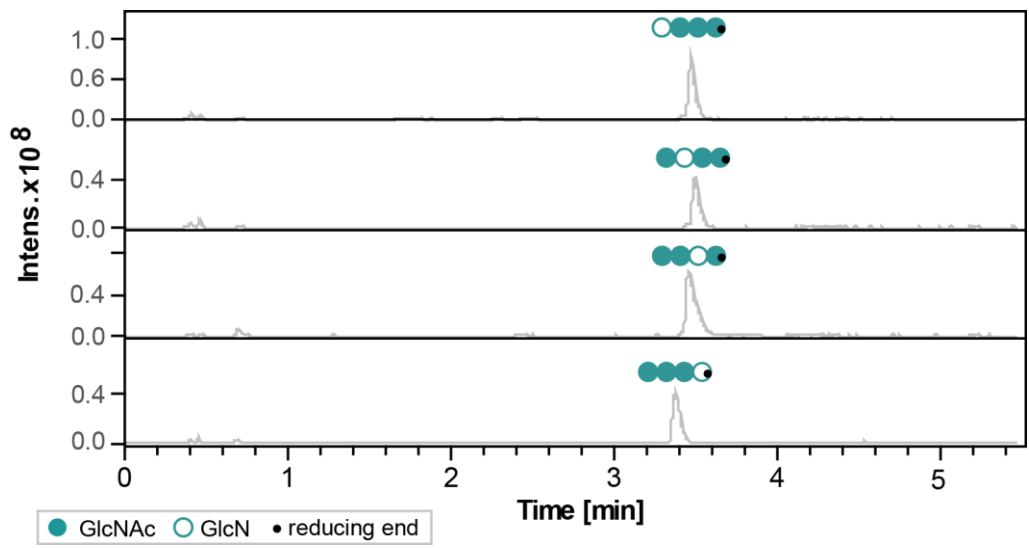

**Supplementary Figure S4** Chromatographic purification up to analytical grade of different (pa)COS. Base peak chromatograms of HILIC-ESI-MS analysis showing purified A1D3 with different patterns of acetylation. Either produced by enzymatic deacetylation of the GlcNAc tetramer using *VcCDA* in combination with *PgtCDA* (ADDD), NodB in combination with *PgtCDA* (DADD), NodB, *VcCDA* and *PesCDA* (DDDA) and enzymatic *N*-acetylation of the GlcN tetramer using *PesCDA* and *CnCDA4* as shown in Figure 7.
